# Supplementary material for: Escargot maintains stemness and suppresses differentiation in Drosophila intestinal stem cells
Source: PubMed Central journal article supplement — EMBO J. 2014 Oct 8;33(24):2967–82. doi: 10.15252/embj.201489072 (PMC4282643; doi:10.15252/embj.201489072), 2014-10-08

*MyoIA-Gal4<sup>ts</sup>, UAS-GFP*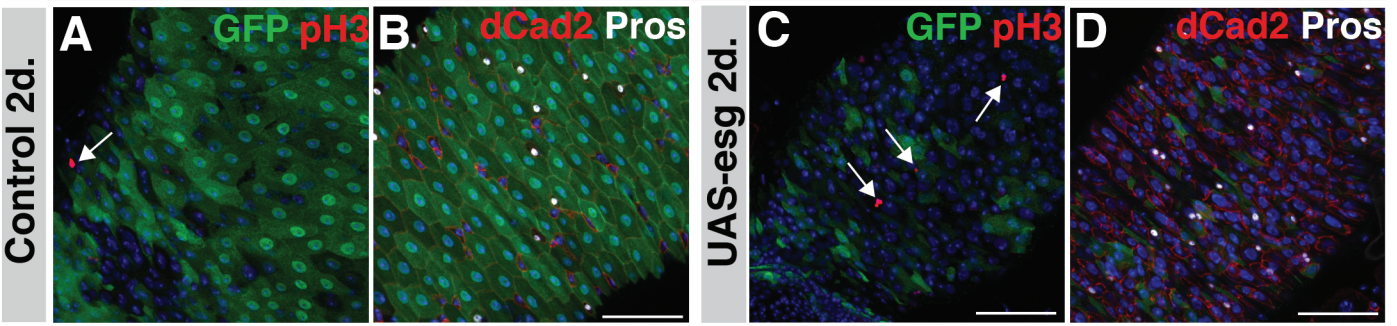*MyoIA-Gal4<sup>ts</sup>, UAS-GFP; Upd3.1-lacZ**MyoIA-Gal4<sup>ts</sup>, UAS-GFP 2d.*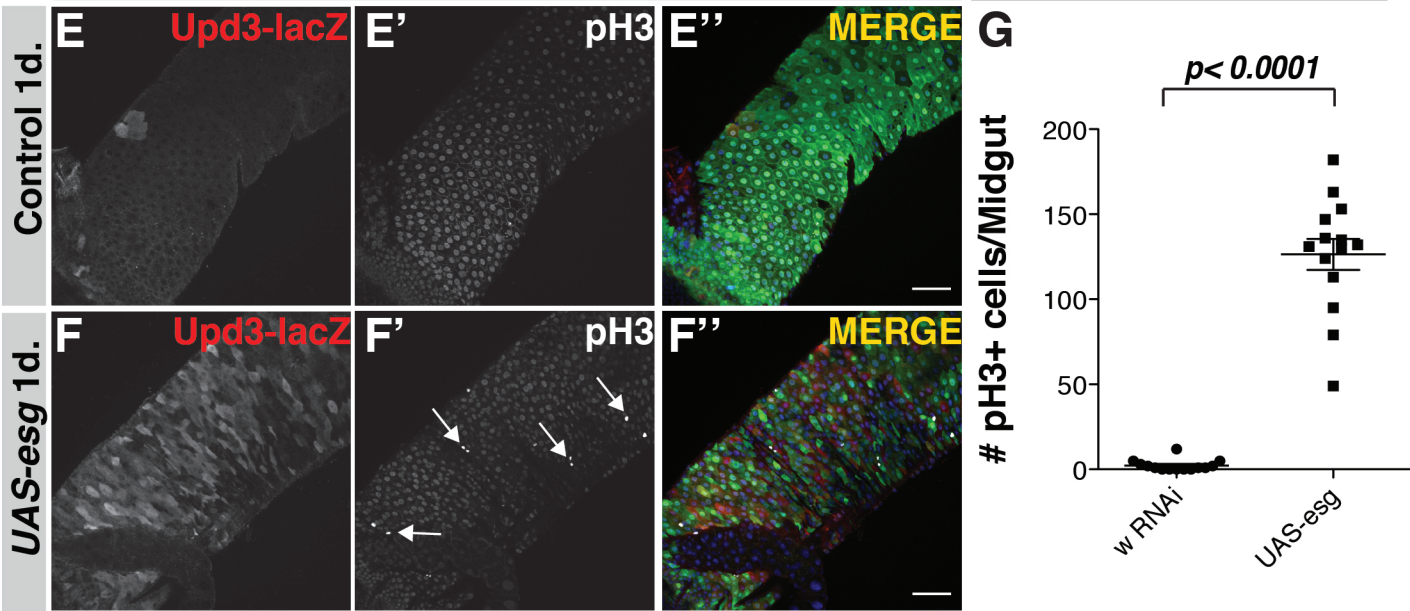*MyoIA-Gal4<sup>ts</sup>, UAS-GFP*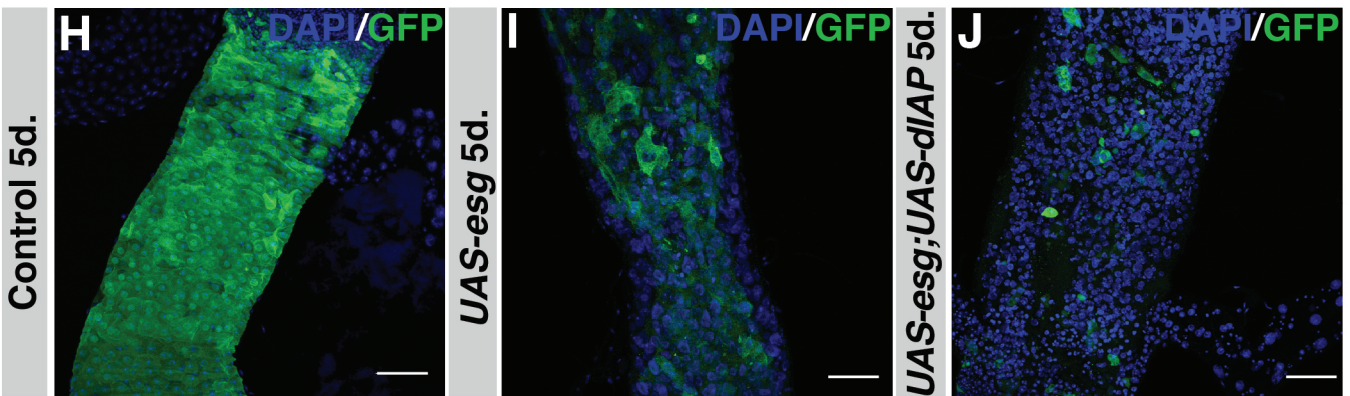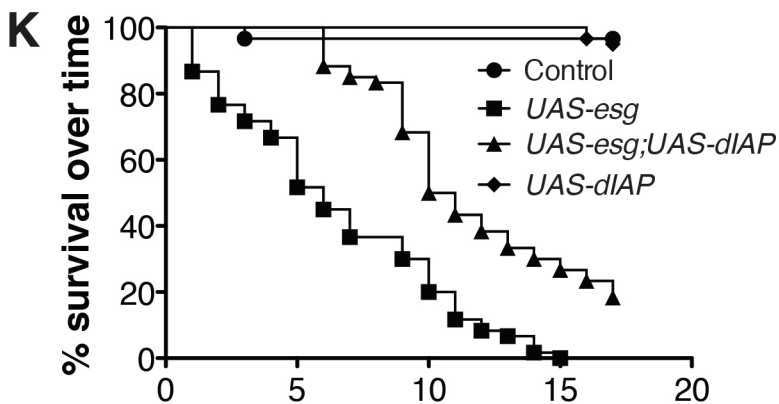

Supplement: embj0033-2967-sd4.pdf [file embj0033-2967-sd4.pdf]
