# Supplementary material for: Escargot maintains stemness and suppresses differentiation in Drosophila intestinal stem cells
Source: PubMed Central journal article supplement — EMBO J. 2014 Oct 8;33(24):2967–82. doi: 10.15252/embj.201489072 (PMC4282643; doi:10.15252/embj.201489072), 2014-10-08
Supplement: embj0033-2967-sd6.pdf [file embj0033-2967-sd6.pdf]

|                         | <i>Notch<sup>RNAi</sup></i> | tumor        | ESG          | ISC          | EB           | EC           | EE           | VM                               |                                  |
|-------------------------|-----------------------------|--------------|--------------|--------------|--------------|--------------|--------------|----------------------------------|----------------------------------|
| <i>esg</i>              | 8.062049115                 | 6.75637615   | 7.489705694  | 8.152174318  | 3.23658608   | 1.40420589   | 1.004121393  |                                  | <b>EMT Transcription factors</b> |
| <i>Snail</i>            | 5.408051358                 | 1.630828268  | 2.874558726  | -1.931978149 | -5.584132941 | -6.11642679  | -7.465164608 |                                  |                                  |
| <i>wor</i>              | -0.773686965                | -4.059073069 | -3.123905344 | -3.508167994 | -8.81880051  | -8.377467522 | -6.293959255 |                                  |                                  |
| <i>zfh1</i>             | -7.262269969                | -6.601711237 | -6.513154566 | -8.457778572 | -7.974640986 | -5.856028749 | -4.082274073 |                                  |                                  |
| <i>zfh2</i>             | 0.985458471                 | 0.513723431  | 0.242417418  | 1.476846503  | -3.46415164  | -2.738832966 | -3.253765101 |                                  |                                  |
| <i>Twist</i>            | -6.810108537                | -9.301337907 | -9.653153272 | -9.653153272 | -7.992425361 | -9.653153272 | -6.560899799 |                                  |                                  |
| <i>N-Cad</i>            | -4.020417903                | -6.513284286 | -7.368366201 | -7.999301814 | -7.26998347  | -6.073727133 | -5.895500989 |                                  | <b>Adhesion molecules</b>        |
| <i>shg/E-Cad</i>        | 0.579976556                 | -0.009172004 | -1.78200587  | -2.2377353   | -2.946360855 | -3.387347885 | -2.941551519 |                                  |                                  |
| <i>pbl</i>              | 2.275100717                 | 0.003721716  | -0.722410995 | 0.526943854  | -3.317030079 | -4.658558418 | 0.304796787  |                                  |                                  |
| <i>RhoL</i>             | 5.834525516                 | 6.095909736  | 5.191537424  | 6.084907368  | 6.893056056  | 6.78458485   | 5.46899354   |                                  |                                  |
| <i>Par-3</i>            | -0.366563837                | -0.716825975 | -1.368273186 | 0.069345384  | 2.321450461  | 1.353983331  | -0.715351386 |                                  |                                  |
| <i>Par-6</i>            | 2.99371663                  | 2.324564048  | 1.90511794   | 2.812084309  | 2.78733682   | 3.539705702  | 2.091785938  |                                  |                                  |
| <i>dlg</i>              | -1.495460814                | -2.863227197 | -2.14342193  | -1.615050366 | -1.079321642 | -1.095333927 | -2.105465789 |                                  |                                  |
| <i>Lgl</i>              | 2.387086714                 | 1.651638975  | 0.779135545  | 1.977427802  | 1.690500731  | 2.838466824  | -0.401873934 |                                  |                                  |
| <i>crb</i>              | -1.092373434                | -0.701013842 | -0.944609431 | -1.783318363 | 0.570978641  | -0.584483281 | 0.38310763   |                                  |                                  |
| <i>scrib</i>            | -0.309278908                | -0.442107331 | -0.691227813 | -1.172774036 | -1.590817422 | -0.536957501 | -0.843620416 |                                  |                                  |
| <i>ZO1</i>              | -1.067449848                | -1.410791784 | -1.106227966 | -1.136360796 | -0.252251636 | -0.060771568 | -0.249362944 |                                  |                                  |
| <i>Myo31-DF</i>         | 3.755677541                 | 3.960143547  | 3.299925869  | 3.275584782  | 3.543785469  | 3.301535757  | 1.682709272  |                                  |                                  |
| <i>Gli</i>              | -0.179780019                | 1.286377777  | -1.357275978 | 0.06093354   | 1.676265369  | 1.327061699  | 0.697456792  |                                  |                                  |
| <i>Mesh</i>             | 3.151575614                 | 4.450598131  | -0.161876681 | 3.784973418  | 5.304337946  | 5.120826931  | 1.541464201  |                                  |                                  |
| <i>Ssk</i>              | 7.651382287                 | 8.612121713  | 5.12520107   | 7.917007863  | 9.293429521  | 9.278079326  | 6.730048061  |                                  |                                  |
| <i>Inx2</i>             | 0.788876567                 | 2.176047349  | 0.913659684  | -1.482674474 | 0.587357252  | -1.323742902 | 1.495308186  |                                  |                                  |
| <i>Inx5</i>             | -6.553120401                | -4.582666871 | -4.732345347 | -7.628876595 | -8.331950332 | -4.144633061 | -4.728453508 |                                  |                                  |
| <i>Inx6</i>             | -8.193177549                | -8.193177549 | -8.193177549 | -8.193177549 | -8.193177549 | -8.193177549 | -3.374860069 |                                  |                                  |
| <i>if/PS2a</i>          | -3.73644907                 | -5.308352425 | -3.299158546 | -4.55201991  | -4.576554177 | -3.773337759 | -1.18641673  |                                  |                                  |
| <i>mys/βPS-integrin</i> | 6.539213369                 | 5.475393883  | 4.87704798   | 6.307312024  | 6.976983119  | 7.614073549  | 3.709847644  |                                  |                                  |
| <i>MMP1</i>             | 1.4273898                   | 1.286925452  | 0.480367558  | 0.054243597  | 0.696523243  | -0.068772671 | 0.192592608  | <b>Matrix metalloproteinases</b> |                                  |
| <i>MMP2</i>             | 1.099051644                 | 0.90784383   | 1.770468666  | -1.177006565 | -0.862499503 | 2.154113629  | -0.713574765 |                                  |                                  |
| <i>Muc91C</i>           | -3.107054733                | -4.411304985 | -3.621740172 | -5.996314413 | -9.284508679 | -2.683401645 | -3.239219968 | <b>Mucins</b>                    |                                  |
| <i>Muc68E</i>           | 0.822700999                 | 2.948219714  | -5.805773602 | -0.293596417 | 4.812132872  | 4.4989485    | -0.299134645 |                                  |                                  |
| <i>Mur18B</i>           | -0.110532673                | 2.513873849  | 0.163848519  | -3.384363974 | -3.606798634 | 5.20915929   | 1.097112333  |                                  |                                  |
| <i>LysB</i>             | -3.237822202                | 0.251650009  | 5.442559743  | 1.141057743  | 2.263649858  | 10.17197787  | 2.058727809  | <b>Digestive enzymes</b>         |                                  |
| <i>LysE</i>             | 0.075755504                 | 1.07550454   | 3.321968664  | 0.039008304  | 3.125887337  | 9.652252255  | 0.911934151  |                                  |                                  |
| <i>alpha-Trypsin</i>    | 7.522357279                 | 10.01483184  | 4.710543038  | 6.38180369   | 12.58079646  | 12.81427977  | 7.428245871  |                                  |                                  |
| <i>Beta-Trypsin</i>     | 6.887827811                 | 8.703053715  | 5.329914018  | 5.848547197  | 13.24137152  | 12.86074716  | 7.644992399  |                                  |                                  |
| <i>epsilon-Trypsin</i>  | 5.489607365                 | 7.652557801  | 4.895355237  | 4.392229552  | 12.06545339  | 12.02718577  | 6.771428898  |                                  |                                  |
| <i>iota-Trypsin</i>     | 3.46312917                  | 5.899050541  | -0.776261767 | 3.339105411  | 8.659627387  | 8.252664432  | 3.953247228  |                                  |                                  |
| <i>Mal-A1</i>           | 4.582985043                 | 7.525166461  | 1.936791209  | 6.011949982  | 9.605613319  | 7.631107598  | 5.699740196  |                                  |                                  |
| <i>Mal-A6</i>           | 3.595903308                 | 6.122352523  | -0.024979711 | 4.228546061  | 8.857550591  | 7.294690583  | 3.395115026  |                                  |                                  |
| <i>Mal-A7</i>           | 2.78005585                  | 5.819246486  | -1.505803041 | 1.972056051  | 8.453359341  | 5.987670534  | 2.791139011  |                                  |                                  |
| <i>Mal-A8</i>           | 1.812900448                 | 4.868708933  | -1.804481737 | 1.871157054  | 7.833629205  | 5.7990527    | 2.646692868  |                                  |                                  |
| <i>PGRP-SC1a</i>        | -1.402287981                | 1.943848333  | -4.080169786 | -2.477660988 | 2.014222715  | 1.947331744  | -0.672978885 | <b>Immunity factors</b>          |                                  |
| <i>PGRP-SC2</i>         | 3.631973068                 | 6.278131883  | 2.64329905   | 2.570726864  | 10.52503393  | 9.451590786  | 3.123295388  |                                  |                                  |
| <i>PGRP-LE</i>          | 2.849190856                 | 3.085047141  | 2.581603601  | 3.384459382  | 4.507997887  | 4.367167644  | 2.68091977   |                                  |                                  |
| <i>bbg</i>              | 0.450235798                 | 0.710053919  | -1.581827367 | 0.024766516  | 1.96111481   | 1.651023691  | -0.456154749 |                                  |                                  |
| <i>Pdm1</i>             | 1.700386035                 | 4.951375265  | -1.911251006 | 3.436133728  | 4.358035264  | 3.523663532  | 0.223579326  | <b>EC cell fate determinants</b> |                                  |
| <i>bowl</i>             | -1.588801615                | -1.023605906 | -1.324776985 | -1.041128046 | 0.205515119  | -0.108146288 | 0.80157089   |                                  |                                  |
| <i>trbl</i>             | 2.58689742                  | 2.067722129  | 2.879971404  | 2.563331316  | 3.290411659  | 2.545650614  | 2.682552784  |                                  |                                  |
