# Supplementary figures and images for: Escargot maintains stemness and suppresses differentiation in Drosophila intestinal stem cells
Source: PubMed Central journal article supplement — EMBO J. 2014 Oct 8;33(24):2967–82. doi: 10.15252/embj.201489072 (PMC4282643; doi:10.15252/embj.201489072), 2014-10-08

*esg-Gal4<sup>ts</sup>, UAS-GFP*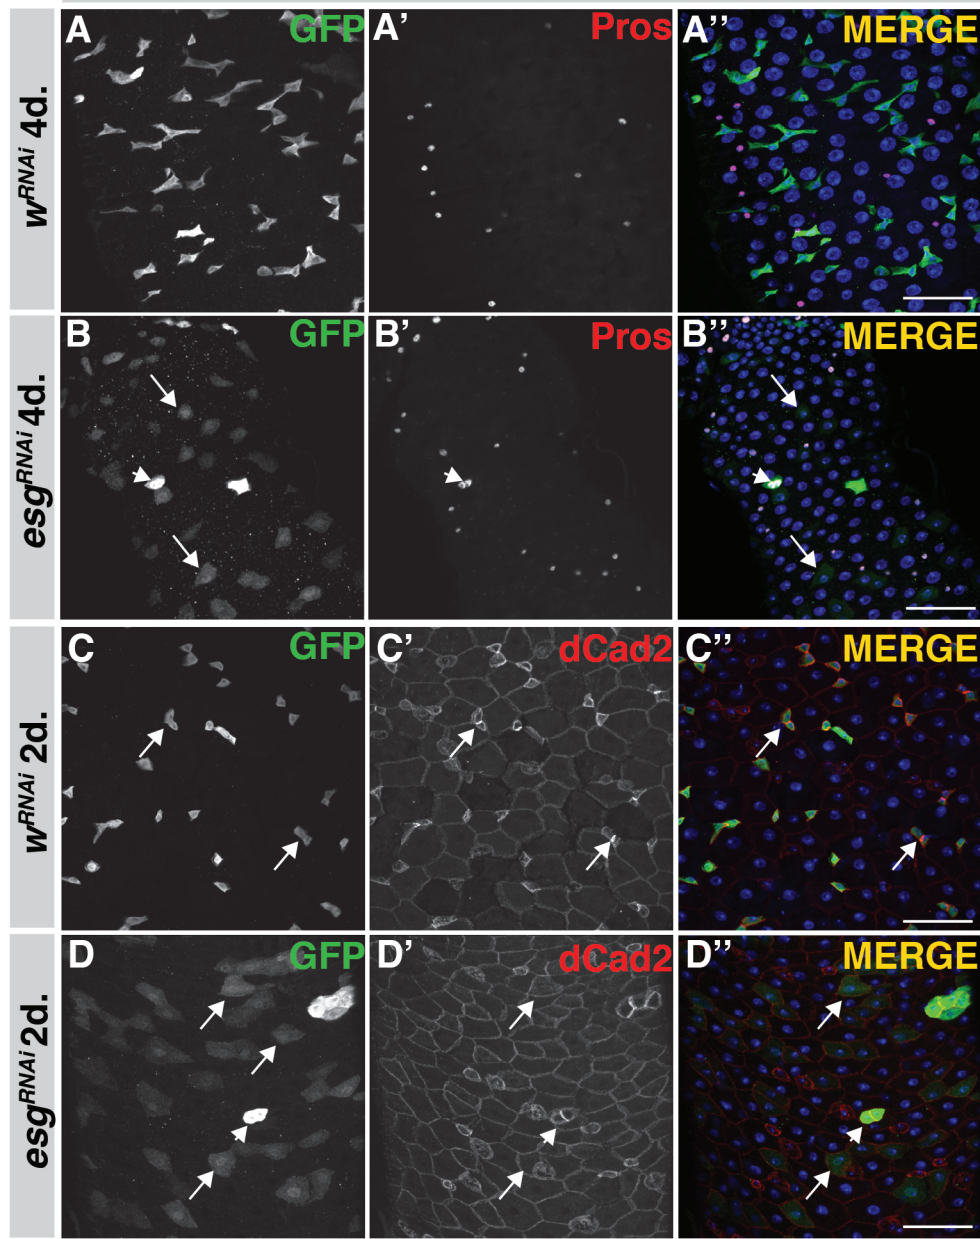

Supplement: embj0033-2967-sd1.pdf [file embj0033-2967-sd1.pdf]

*Su(H)-GBE-Gal4<sup>ts</sup>, UAS-GFP*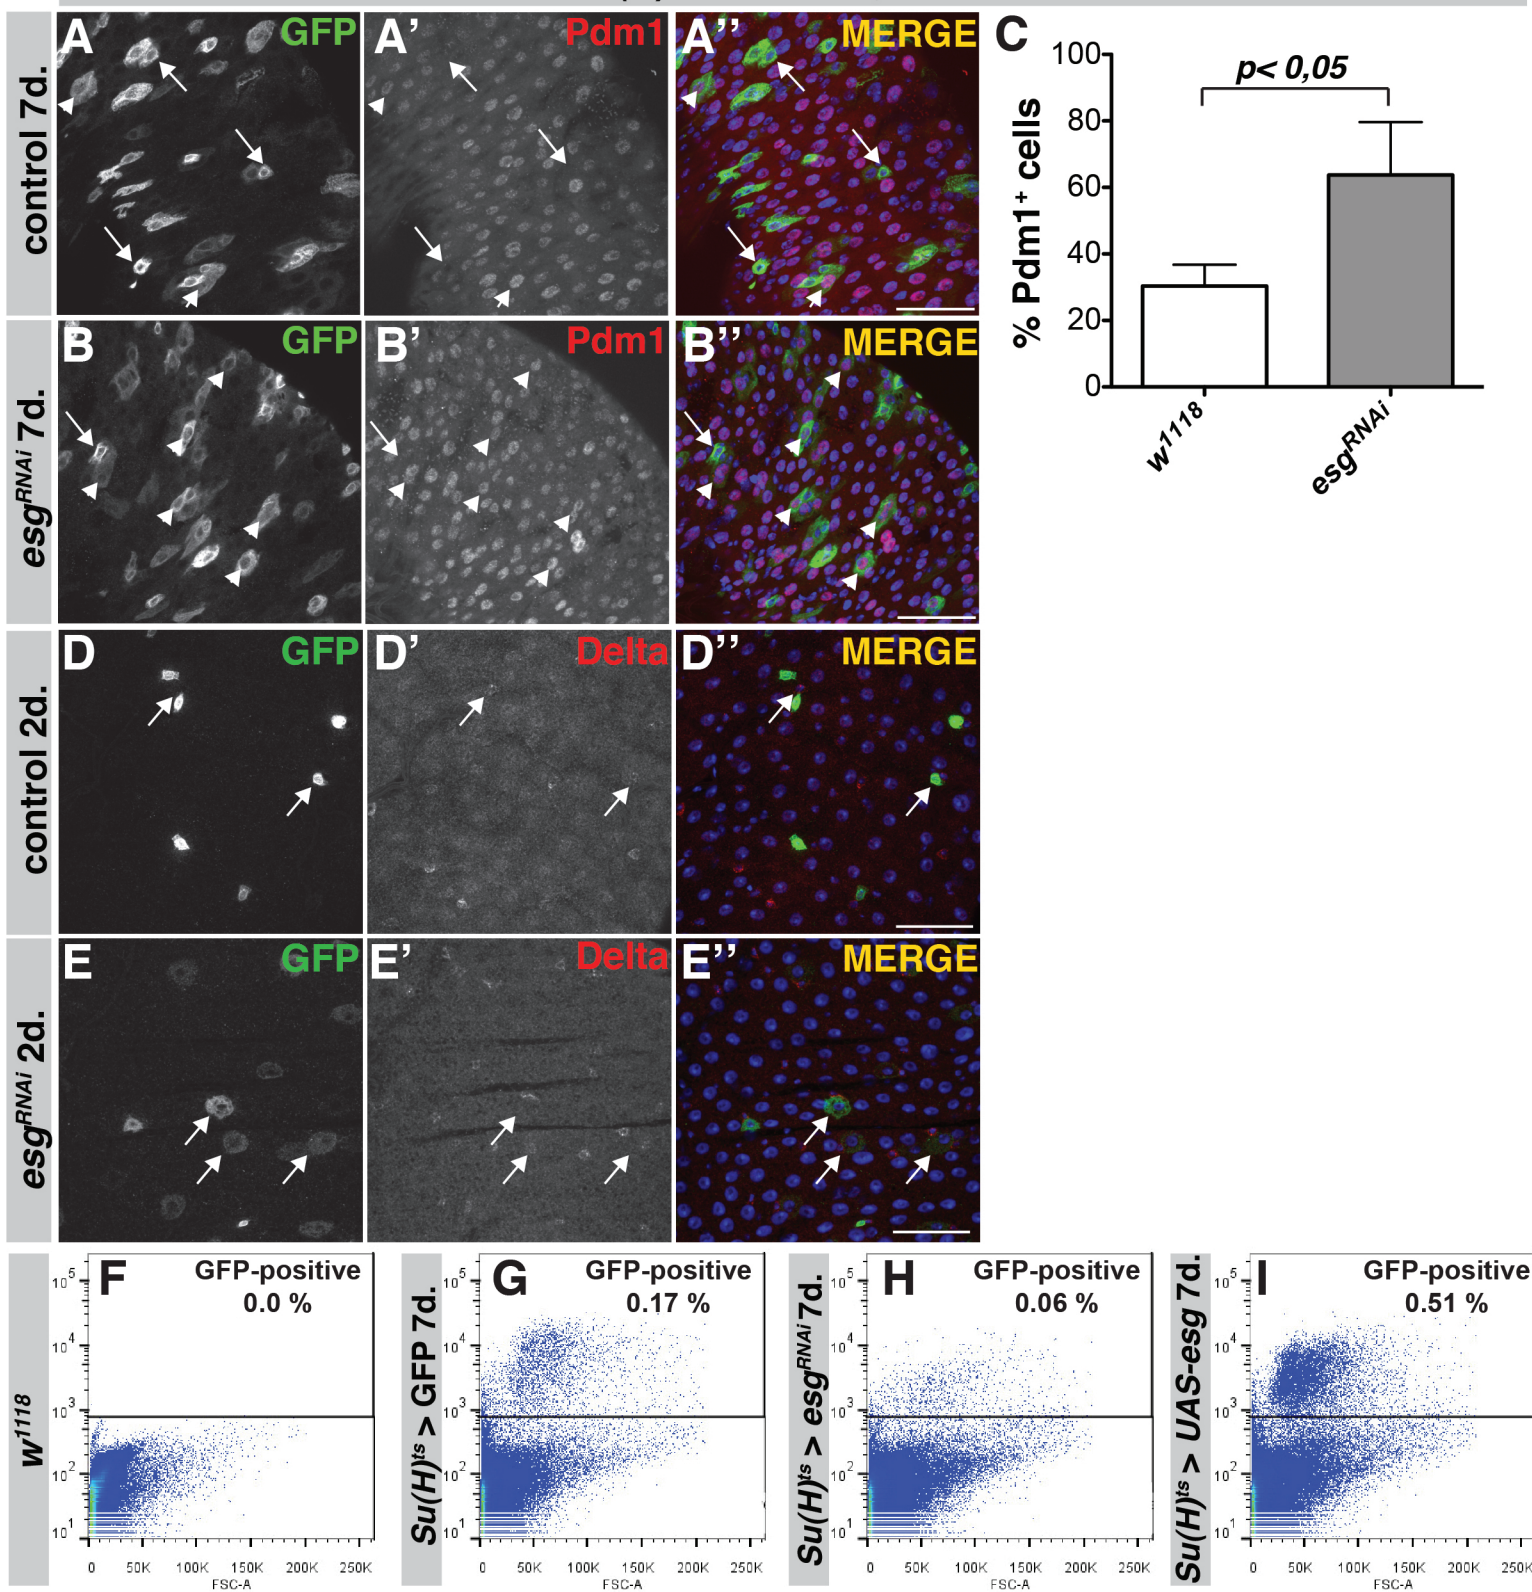

Supplement: embj0033-2967-sd2.pdf [file embj0033-2967-sd2.pdf]

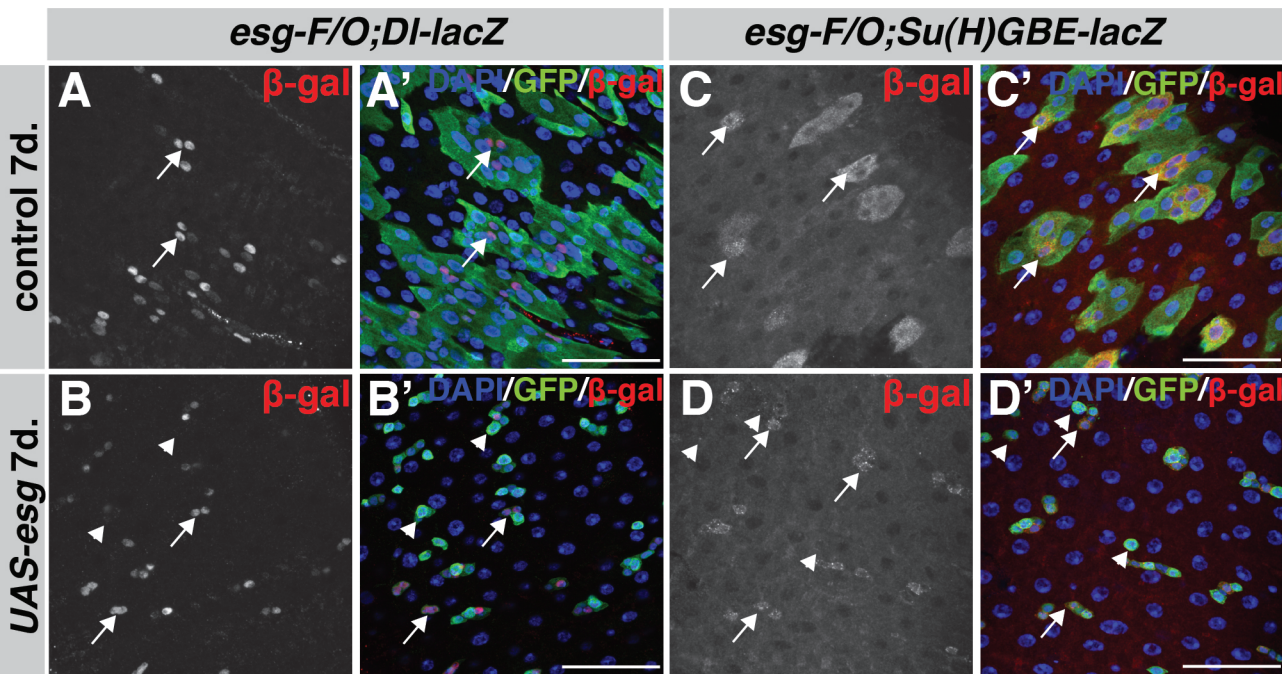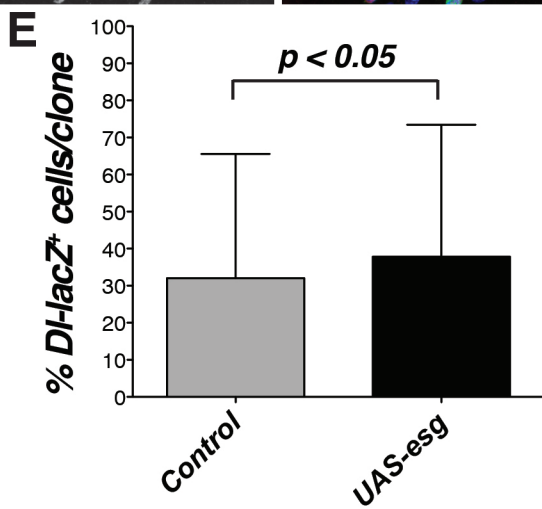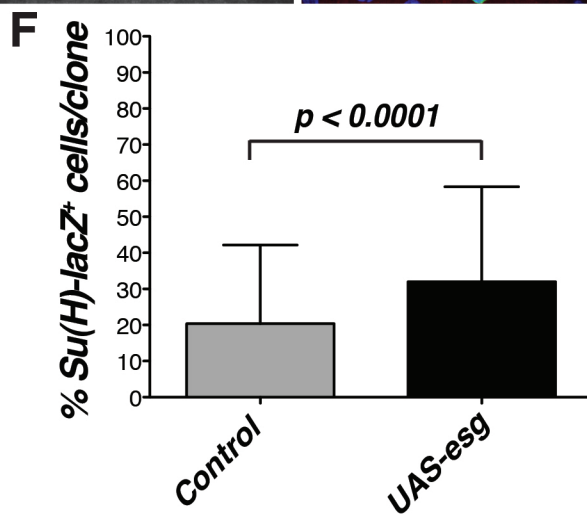

Supplement: embj0033-2967-sd3.pdf [file embj0033-2967-sd3.pdf]

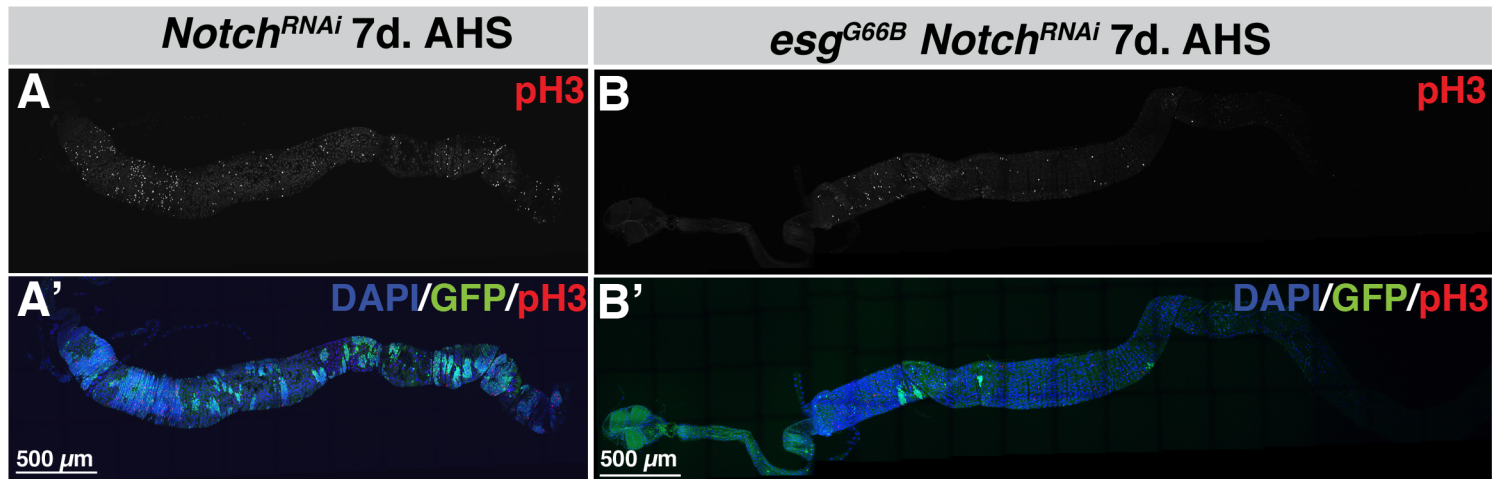**FRT40A MARCM**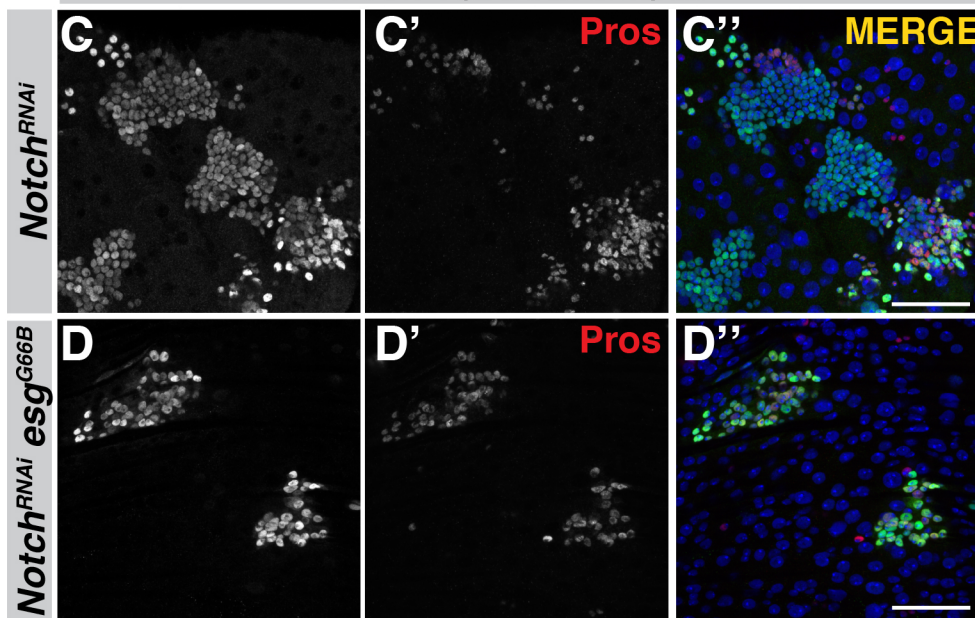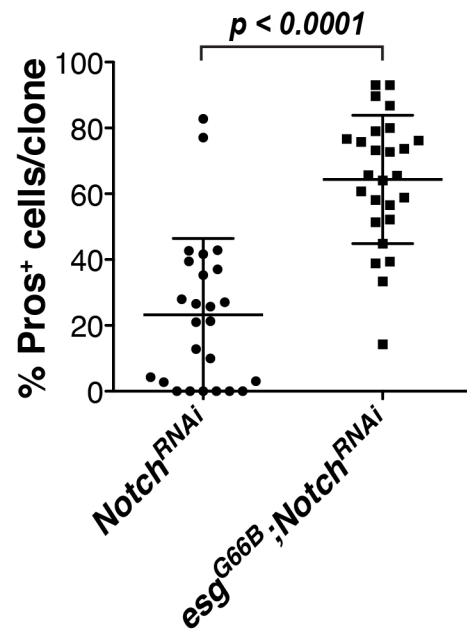

Supplement: embj0033-2967-sd5.pdf [file embj0033-2967-sd5.pdf]
